# Supplementary material for: Photodissociation dynamics of dinitrite at 355 nm: initiation of a reactive pathway
Source: Royal Society of Chemistry journal article supplement (doi:10.1039/c6cp03049a), 2016-01-01
Supplement: c6cp03049a1.pdf [file c6cp03049a1.pdf]

## **Supporting Information**

### **Photodissociation dynamics of dinitrite at 355nm: initiation of a reactive pathway**

Lingxuan Wang, Lily Zu\*

*College of Chemistry, Beijing Normal University, Beijing, 100875, People's Republic of China*

## Table of content

|                                                                                                                                                                   |          |
|-------------------------------------------------------------------------------------------------------------------------------------------------------------------|----------|
| <i>Table S1 The vapor pressures of dinitrites and the precursor diols at 25°C</i>                                                                                 | <i>1</i> |
| <i>Fig S1 NMR spectra of 1,2-butyl dinitrite ,1,3-butyl dinitrite and 2,3-butyl dinitrite</i>                                                                     | <i>2</i> |
| <i>Fig S2 IR spectra of 1,2-butyl dinitrite ,1,3-butyl dinitrite and 2,3-butyl dinitrite</i>                                                                      | <i>3</i> |
| <i>Table S2 Vertical excitation energies and oscillator strengths for 1,2-butyl dinitrite, 1,3-butyl dinitrite and 2,3-butyl dinitrite</i>                        | <i>4</i> |
| <i>Fig S3 The LIF spectra obtained via 355 nm photolysis of 1,2-propyl dinitrite and 1,3-propyl dinitrite in the supersonic jet with He or Ar as carrier gas.</i> | <i>5</i> |
| <i>Fig S4 Schematic energy diagram of the secondary dissociation of 1,2-butyl dinitrite</i>                                                                       | <i>6</i> |
| <i>Fig S5 Schematic energy diagram of the secondary dissociation of 2,3-butyl dinitrite</i>                                                                       | <i>7</i> |

**Table S1.** The vapor pressures<sup>a</sup> (VP, in Torr) of dinitrites and the precursor diols at 25°C

| Dinitrites           | VP <sup>a</sup> | Diols           | VP <sup>a</sup> |
|----------------------|-----------------|-----------------|-----------------|
| 1,2-propyl dinitrite | 21.4            | 1,2-propanediol | 0.204           |
| 1,3-propyl dinitrite | 14.8            | 1,3-propanediol | 0.0343          |
| 1,2-butyl dinitrite  | -               | 1,2-butanediol  | 0.148           |
| 1,3-butyl dinitrite  | 7.02            | 1,3-butanediol  | 0.0541          |
| 2,3-butyl dinitrite  | 9.87            | 2,3-butanediol  | 0.260           |

<sup>a</sup>Data taken from ACD/Labs, version 11.02, Advanced Chemistry Development, Inc., Toronto, ON, Canada, [www.acdlabs.com](http://www.acdlabs.com), 2015.

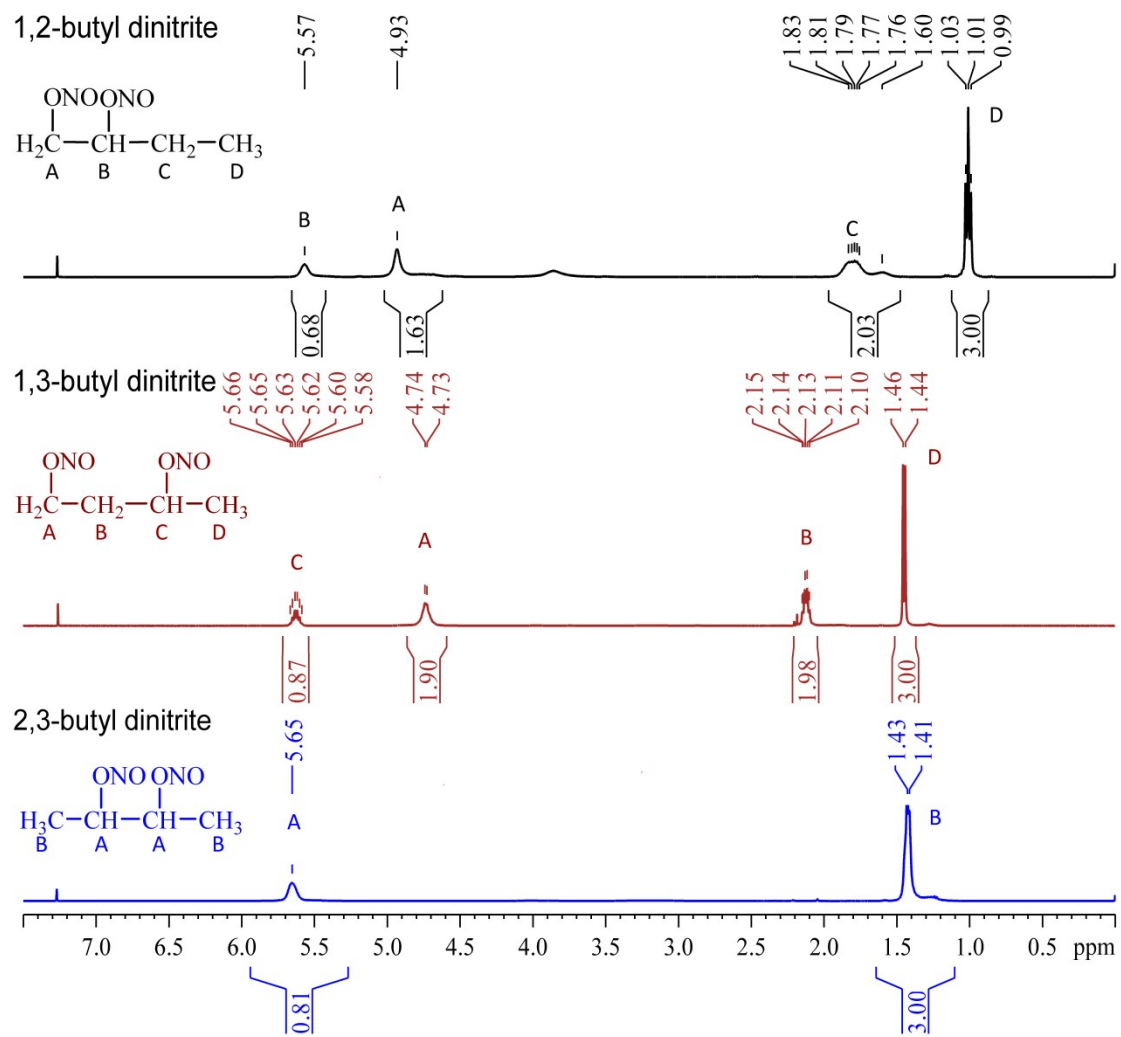

Fig. S1 NMR spectra of 1,2-butyl dinitrite ,1,3-butyl dinitrite and 2,3-butyl dinitrite.

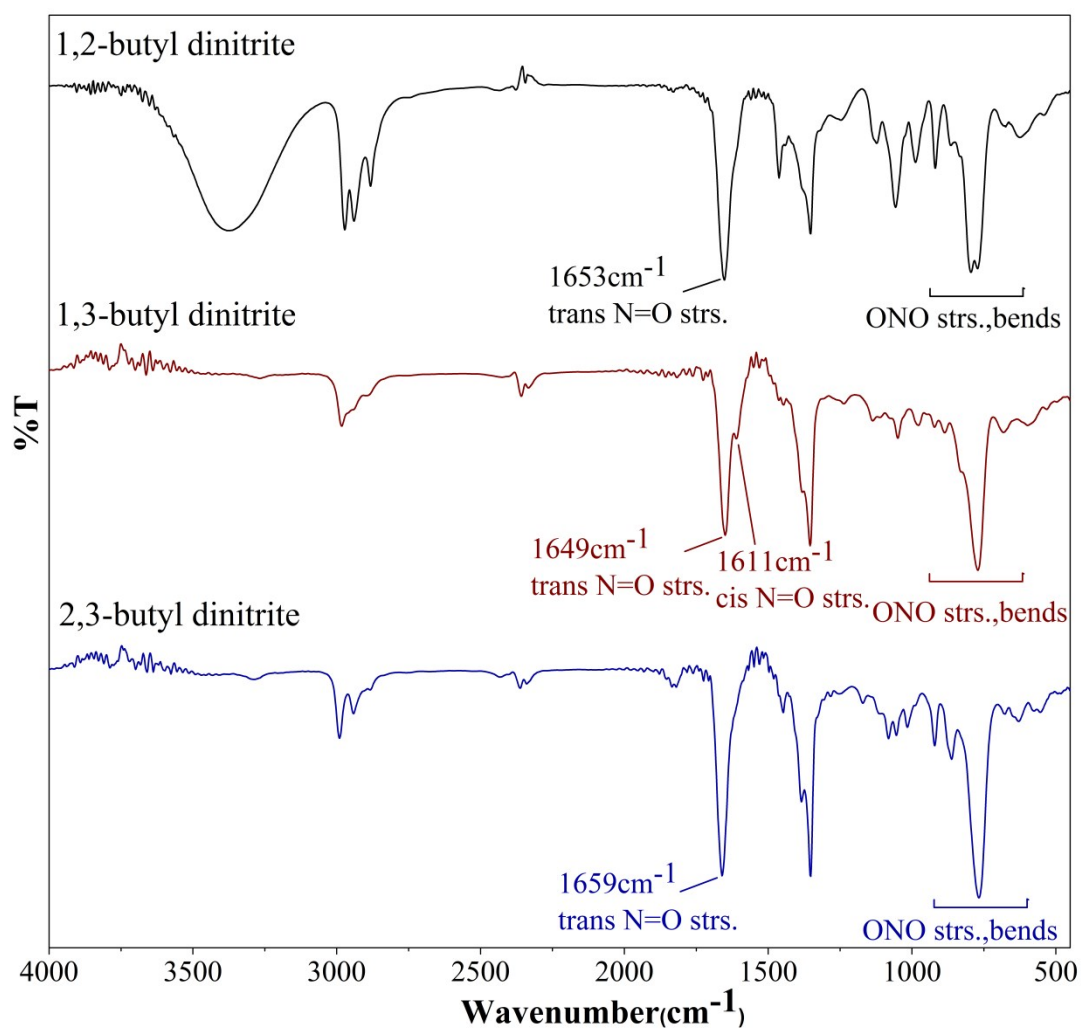

Fig. S2 IR spectra of 1,2-butyl dinitrite ,1,3-butyl dinitrite and 2,3-butyl dinitrite.

**Table S2** Vertical excitation energies (VEE, eV) and oscillator strengths (OS) for 1,2-butyl dinitrite, 1,3-butyl dinitrite and 2,3-butyl dinitrite of the singlet-singlet transitions by TDDFT method

| 1,2-butyl dinitrite |                                                             |      |        | 2,3-butyl dinitrite                                         |      |        |
|---------------------|-------------------------------------------------------------|------|--------|-------------------------------------------------------------|------|--------|
|                     | Excitation(no. of initial orbital-the no. of final orbital) | VEE  | OS     | Excitation(no. of initial orbital-the no. of final orbital) | VEE  | OS     |
| 1                   | 39(HOMO)-40(LUMO)                                           | 3.43 | 0.0004 | 39(HOMO)-40(LUMO)                                           | 3.42 | 0.0003 |
| 2                   | 38(HOMO-1)-40(LUMO)                                         | 3.45 | 0.0012 | 38(HOMO-1)-40(LUMO)                                         | 3.45 | 0.0012 |
| 3                   | 39(HOMO)-41(LUMO+1)                                         | 4.58 | 0.0013 | 39(HOMO)-41(LUMO)                                           | 4.59 | 0.0021 |
| 4                   | 38(HOMO-1)-41(LUMO+1)                                       | 4.64 | 0.0008 | 38(HOMO-1)-41(LUMO+1)                                       | 4.60 | 0.0004 |
| 5                   | 37(HOMO-2)-40(LUMO)                                         | 5.10 | 0.0415 | 37(HOMO-2)-40(LUMO)                                         | 5.21 | 0.0373 |
| 6                   | 37(HOMO-2)-41(LUMO+1)                                       | 5.32 | 0.0500 | 37(HOMO-2)-41(LUMO+1)                                       | 5.41 | 0.0457 |
| 7                   | 36(HOMO-3)-40(LUMO)                                         | 5.92 | 0.0356 | 36(HOMO-3)-40(LUMO)                                         | 5.79 | 0.0503 |
| 8                   | 36(HOMO-3)-41(LUMO+1)                                       | 6.11 | 0.0034 | 36(HOMO-3)-41(LUMO+1)                                       | 5.97 | 0.0069 |

  

| 1,3-butyl dinitrite |                                                             |      |        |
|---------------------|-------------------------------------------------------------|------|--------|
|                     | Excitation(no. of initial orbital-the no. of final orbital) | VEE  | OS     |
| 1                   | 39(HOMO)-40(LUMO)                                           | 3.39 | 0.0008 |
| 2                   | 38(HOMO-1)-40(LUMO)                                         | 3.42 | 0.0013 |
| 3                   | 39(HOMO)-40(LUMO)                                           | 4.57 | 0.0001 |
| 4                   | 38(HOMO-1)-41(LUMO+1)                                       | 4.67 | 0.0000 |
| 5                   | 37(HOMO-2)-40(LUMO)                                         | 5.42 | 0.1315 |
| 6                   | 37(HOMO-2)-41(LUMO+1)                                       | 5.51 | 0.0031 |
| 7                   | 36(HOMO-3)-40(LUMO)                                         | 5.69 | 0.0226 |
| 8                   | 36(HOMO-3)-41(LUMO+1)                                       | 5.73 | 0.0011 |

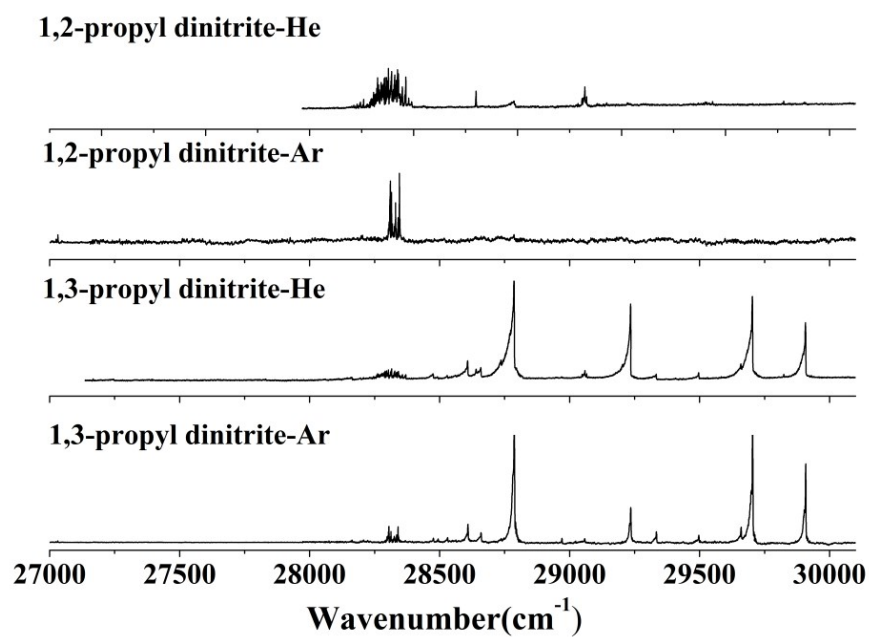

**Fig.S3** The LIF spectra obtained via 355 nm photolysis of 1,2-propyl dinitrite and 1,3-propyl dinitrite in the supersonic jet with He or Ar as carrier gas.

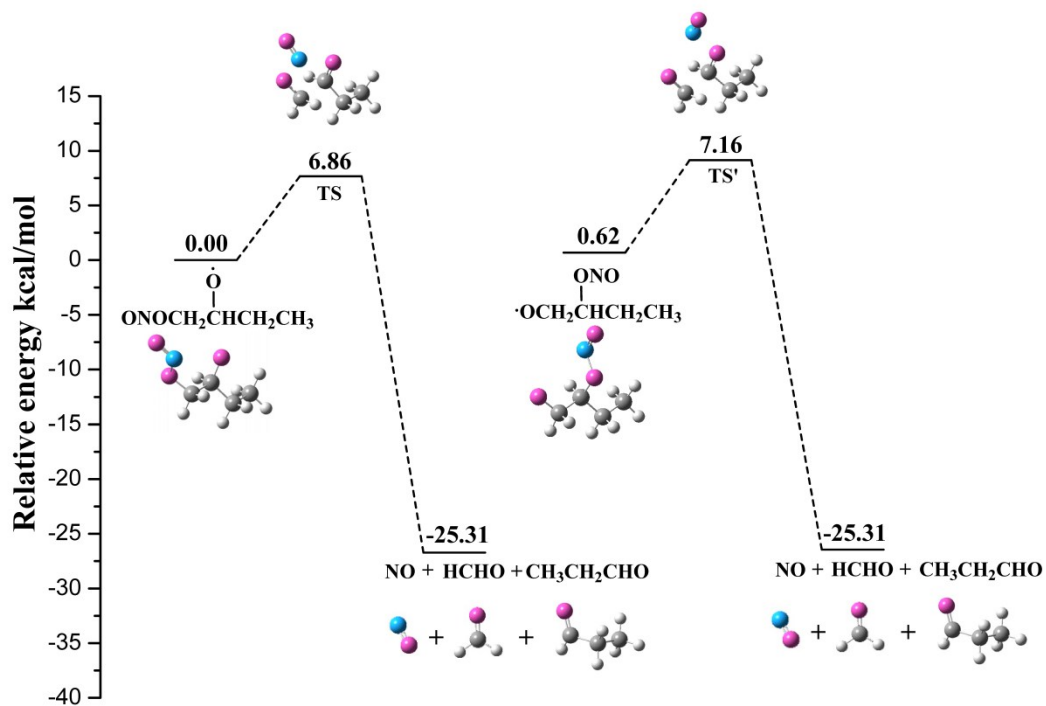

**Fig. S4** Schematic energy diagram of the secondary dissociation of 1,2-butyl dinitrite in the ground state (energy is given in kcal/mol).



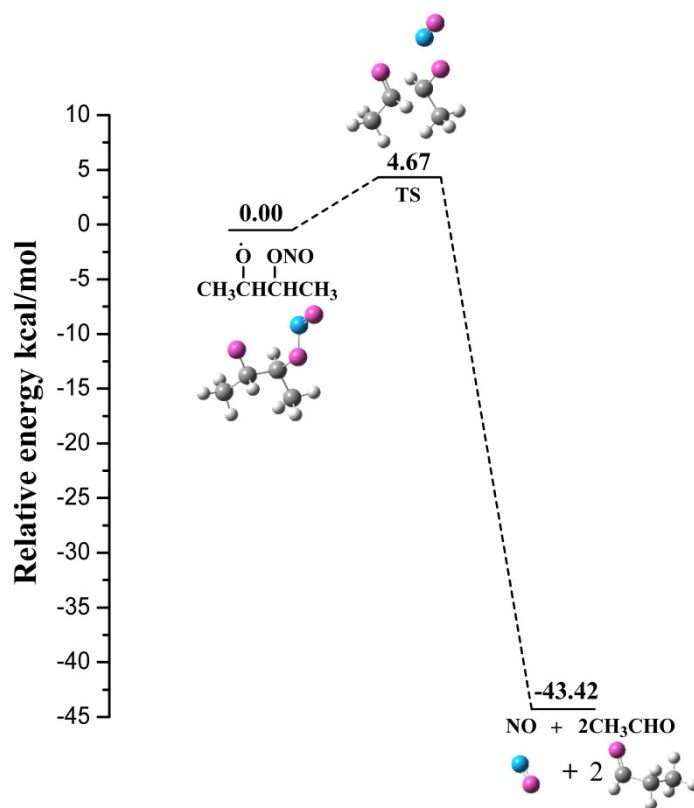

**Fig. S5** Schematic energy diagram of the secondary dissociation of 2,3-butyl dinitrite in the ground state (energy is given in kcal/mol).
